# Supplementary material for: Small heat shock proteins target mutant cystic fibrosis transmembrane conductance regulator for degradation via a small ubiquitin-like modifier–dependent pathway
Source: PubMed Central journal article supplement — Mol Biol Cell. 2013 Jan 15;24(2):74–84. doi: 10.1091/mbc.E12-09-0678 (PMC3541966; doi:10.1091/mbc.e12-09-0678), 2013-01-15
Supplement: supp_E12-09-0678v1_CombinedSupMats.pdf [file supp_E12-09-0678v1_CombinedSupMats.pdf]

**Supplemental Material:**

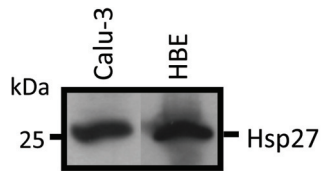

**1. Hsp27 is expressed in airway cells.**

Hsp27 was detected by immunoblot analysis of lysates from Calu-3 cells and polarized human bronchial epithelia (HBE) primary cultures.

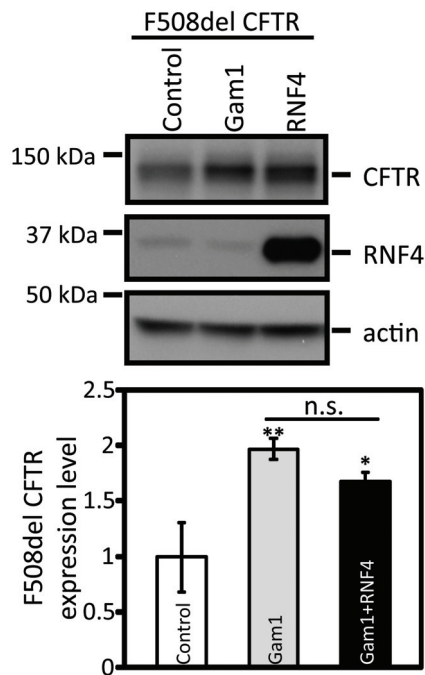

## 2. RNF4 requires a functional SUMOylation pathway to reduce F508del CFTR expression.

HEK cells were transfected with F508del CFTR, RNF4 or control vector, and Gam1 or empty vector, as indicated. After 24 hrs, F508del CFTR levels were determined by IB, averaged and normalized to their respective controls. The summary data provides the results of four independent experiments. SEM, \*\*p=0.002, \*p=0.012; n.s., no significant difference.
